# Supplementary material for: Charge transfer in DNA assemblies: effects of sticky ends
Source: Royal Society of Chemistry journal article supplement (doi:10.1039/b801876f), 2008-01-01
Supplement: b801876f.pdf [file b801876f.pdf]

Electronic Supporting Information:

### Charge Transfer in DNA Assembly: Effects of Sticky End

*Yasuko Osakada, Kiyohiko Kawai\*, Mamoru Fujitsuka, and Tetsuro Majima\**

The Institute of Scientific and Industrial Research (SANKEN), Osaka University,

Mihogaoka 8-1, Ibaraki, Osaka 567-0047, Japan.

Tel:(+81)6-6879-8495, Fax:(+81)6-6879-8499

(a)

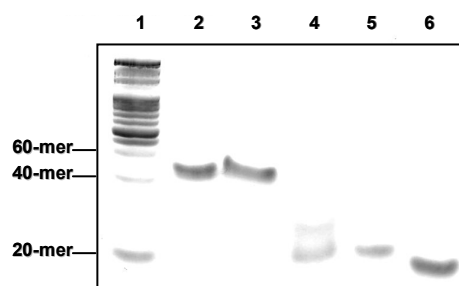

(b)

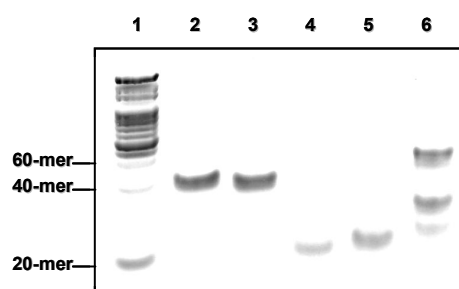

Figure S1. Characterization of the DNA assemblies. 15% Nondenaturing PAGE analysis. (a) Lane 1: 20-bp DNA ladder; lane 2: ST10; lane 3: ST8; lane 4: ST6; lane 5: ST4; lane 6: ST2. (b) Lane 1: 20-bp DNA ladder; lane 2: N1 + P1 (ST10); lane 3: N2 + P2; lane 4: N1+P2; lane 5: N2+P1; lane 6: N1+ C +P2.

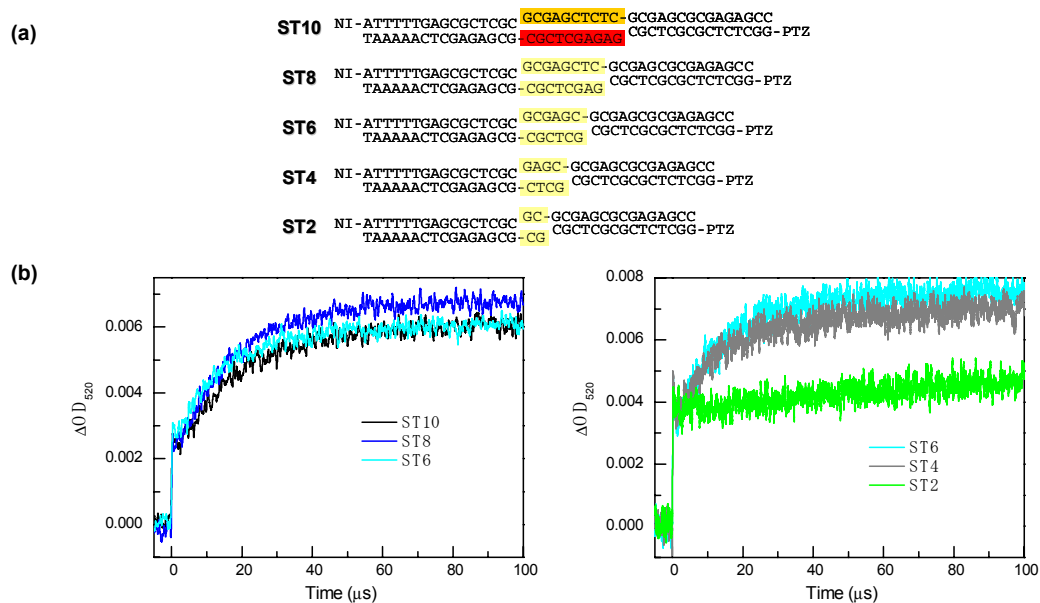

Figure S2. (a) Schematic illustration of DNA assembly for the examination of the effects of sticky end length: **ST10**, **ST8**, **ST6**, **ST4** and **ST2**. (b) Time profiles of the transient absorption of **PTZ<sup>•+</sup>** monitored at 520 nm during the 355 nm laser flash photolysis of **ST10** (black), **ST8** (blue), **ST6** (cyan), **ST4** (gray) and **ST2** (gray), respectively. The represented profiles were obtained from the accumulation of 32 laser shots.

## Experimental

### DNA Synthesis.

All reagents for DNA synthesis were purchased from Glen Research. Cyanoethyl phosphoramidites of *N*-(3-hydroxy-propyl)-1,8-naphthalimide and 10-(2-Hydroxyethyl)phenothiazine were synthesized as previously reported<sup>1,2</sup> DNA used in this study was synthesized on an Applied Biosystems DNA synthesizer with standard solid-phase techniques and purified on a JASCO HPLC with a reverse-phase C-18 column with an acetonitrile/50 mM ammonium formate gradient. Duplex solutions were prepared by mixing equimolar amounts of the desired DNA complements and gradually annealing with cooling from 80°C to room temperature. Cooling was performed over 16 h. DNAs conjugated with NI and PTZ at the 5' end were synthesized according to a previous procedure. 5' end phosphorylated oligonucleotides were synthesized by Chemical Phosphorylation Reagents II (Glen Research). DNA ligation reaction was carried out as previously described.<sup>3</sup> In briefly, a sample solution (25 µL) containing 2 µM NI- and PTZ-modified DNAs, 2µM phosphorylated DNA strands (sample, P), 66 mM Tris-HCl buffer (pH 7.6), 6.6 mM MgCl<sub>2</sub>, 0.1 M NaCl, 10 mM DTT, and 1 mM ATP was heated at 80 °C for 10 min, then gradually cooled down to 16 °C (1.0 °C/min) by a thermal cycler (BIORAD). T4 DNA ligase (20 unit, TOYOBO)

was added to the mixtures, and the reaction was carried out at 16 °C for 16 h. After the reaction, the mixture was heated at 85 °C and desalted with Micro Bio-Spin Chromatography Column (BIORAD) before sample preparation for laser flash photolysis.

### **Laser Flash Photolysis Experiments.**

Nanosecond transient absorption measurements were performed as previously described.<sup>4-7</sup> The third-harmonic oscillation (355 nm, fwhm of 4 ns, 20 mJ/pulse) from a Q-switched Nd:YAG laser (Continuum, Surelight) was used for the excitation light. A xenon flash lamp (Osram, XBO-450) was focused into the sample solution as the probe light for the transient absorption measurement. Time profiles of the transient absorption in the UV-visible region were measured with a monochromator (Nikon, G250) equipped with a photomultiplier (Hamamatsu Photonics, R928) and digital oscilloscope (Tektronics, TDS-580D).

### Gel shift assay.

50  $\mu$ M each of DNA strands were annealed in 100 mM NaCl, 20 mM Na phosphate buffer (pH 7.0) from 95 °C to room temperature. After incubation, an amount of glycerol (50%) equal to 10% of the reaction volume was added and resulting sample was loaded onto 15% nondenaturing polyacrylamide gel at 200 V for 2 hr. The gel was stained by Stains-All (Sigma).<sup>8,9</sup>

### References.

1. K. Kawai, T. Takada, S. Tojo and T. Majima, *Tetrahedron Lett.*, 2001, **43**, 89-91.
2. K. Kawai, K. Kawabata, S. Tojo and T. Majima, *Bioorg. Med. Chem. Lett.*, 2002, **12**, 2363-2366.
3. M. Endo, S. Uegaki and T. Majima, *Chem. Commun.*, 2005, 3153-3155.
4. T. Takada, K. Kawai, M. Fujitsuka and T. Majima, *Proc. Natl. Acad. Sci. USA*, 2004, **101**, 14002-14006.
5. T. Takada, K. Kawai, M. Fujitsuka and T. Majima, *Chem. Eur. J.*, 2005, **11**, 3835-3842.
6. Y. Osakada, K. Kawai, M. Fujitsuka and T. Majima, *Proc. Natl. Acad. Sci. USA*, 2006, **103**, 18072-18076.
7. K. Kawai, Y. Osakada, A. Sugimoto, M. Fujitsuka and T. Majima, *Chem. Eur. J.*, 2007, **13**, 2386-2391.
8. C. Lin, X. Wang, Y. Liu, N. C. Seeman and H. Yan, *J. Am. Chem. Soc.*, 2007, **129**, 14475-14481.
9. K. Nakatani, C. Dohno, A. Ogawa and I. Saito, *Chem. Biol.*, 2002, **9**, 361-366.
